# Supplementary material for: An Approach to In Vitro Manufacturing of Hypertrophic Cartilage Matrix for Bone Repair
Source: Bioengineering (Basel). 2017 Apr 20;4(2):35. doi: 10.3390/bioengineering4020035 (PMC5590482; doi:10.3390/bioengineering4020035)
Supplement: Supplementary file 1 [file bioengineering-04-00035-s001.pdf]

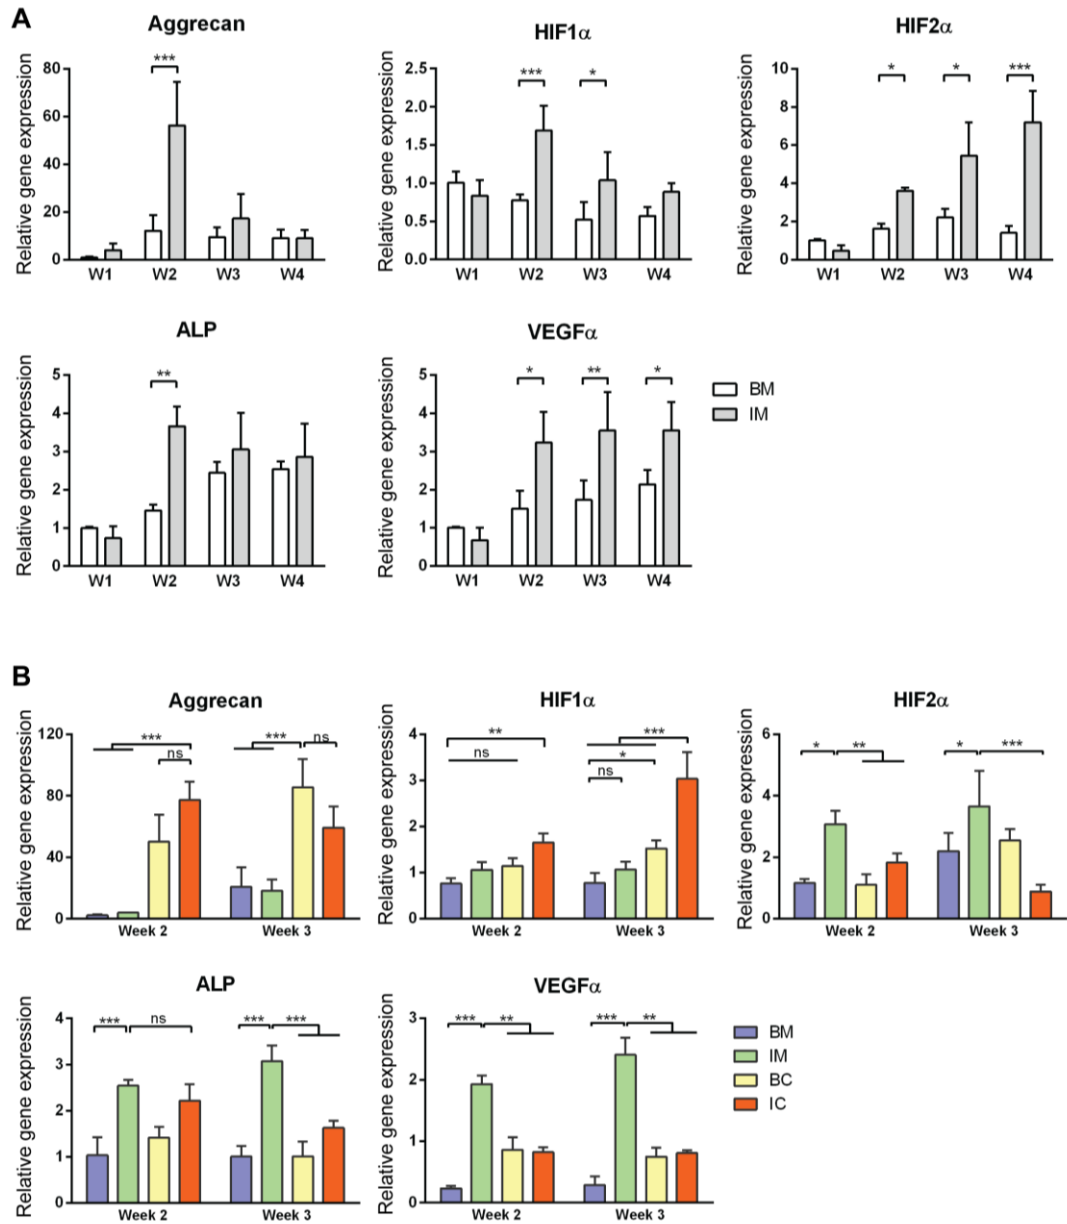

**Figure S1.** Gene expression of MiTEC cultured in BM (white bar) and IM (gray bar) at week 1-4 (**A**). Gene expression of MiTEC cultured in BM (blue bar), IM (green bar), BC (yellow bar) and IC (red bar) medium at week 2-3 (**B**). Error bars represent standard deviation (n=3). (\*) denotes p<0.05, (\*\*) denotes p<0.01, (\*\*\*) denotes p<0.001, and ns denotes non-significant.

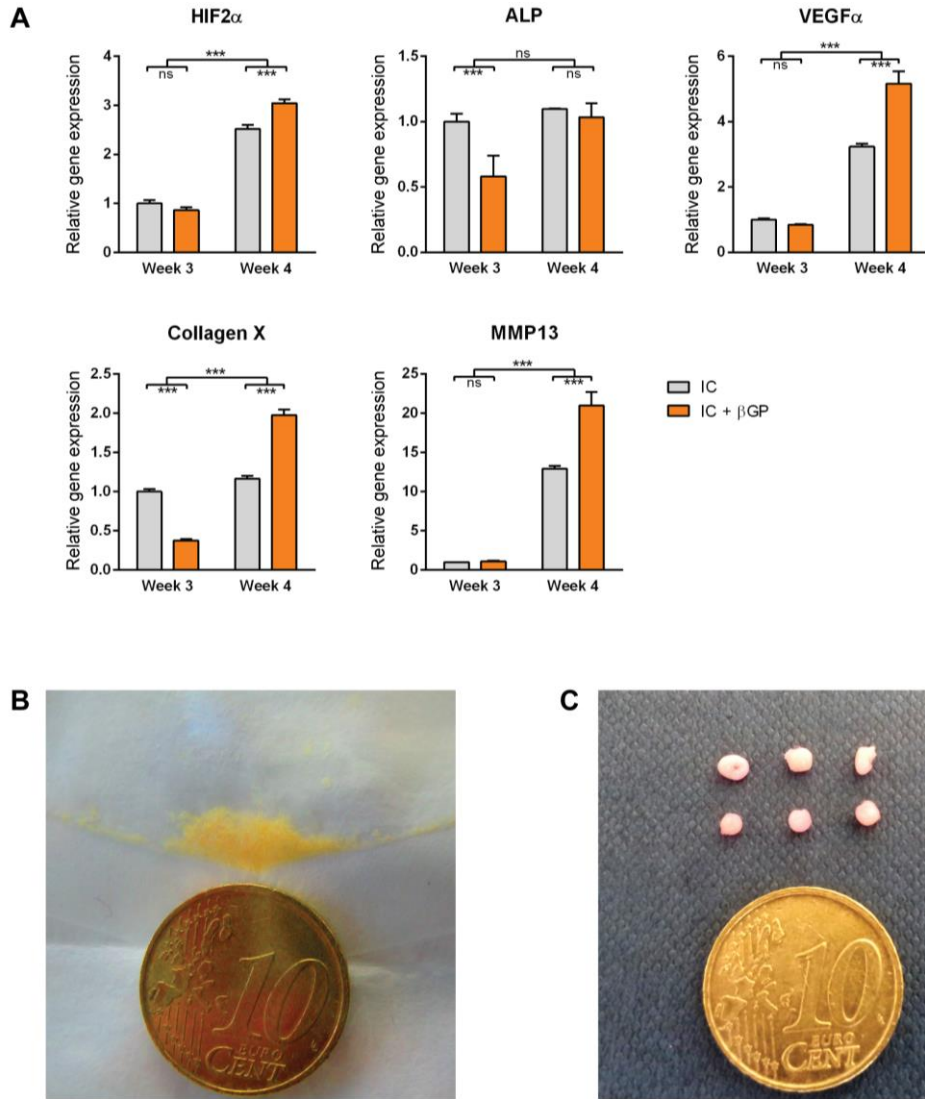

**Figure S2.** Gene expression analysis of MiTEC cultured in basic medium and mineralization medium (1 week in mineralization medium before time point) at week 3 and 4 (**A**). Error bars represent standard deviation (n=3). (\*) denotes  $p < 0.05$ , (\*\*) denotes  $p < 0.01$ , (\*\*\*) denotes  $p < 0.001$ , and ns denotes non-significant. MiTEC were cultured in IC medium for 2 weeks, decellularized with SDS and air-dried; the picture showed the amount of MiTEC harvested from one 12-well plate (**B**). Pellets of  $2.5 \times 10^5$  hMSCs mixed with devitalized (top row) and decellularized (bottom row) MiTEC, and cultured in chondrogenic medium for 4 weeks (**C**).
